# Supplementary material
Source: publisher figshare collection journal article supplement (https://diabetesjournals.figshare.com/articles/dataset/_/22106990)
Supplement: Supplementary file 1 [file 2]

# Supplementary Materials

## Table of Contents

|                                                                                                                                                                                                                                                                |    |
|----------------------------------------------------------------------------------------------------------------------------------------------------------------------------------------------------------------------------------------------------------------|----|
| sFigure 1. Illustration of study design .....                                                                                                                                                                                                                  | 1  |
| sFigure 2. Flowchart showing attrition of patients and identification of the study cohort.....                                                                                                                                                                 | 2  |
| sFigure 3. Temporal trends of prescribing for second-line treatment in addition to metformin for people with type 2 diabetes in Scotland between 2007 and 2017.....                                                                                            | 3  |
| sFigure 4. Boxplots of practice-level proportion of SU prescribing for initiating second-line treatment in addition to metformin among people with type 2 diabetes in Scotland between 2010 and 2017.....                                                      | 4  |
| sTable 1. Incidence rates of study outcomes among people with type 2 diabetes in Scotland treated with sulphonylureas (SU), DPP-4 inhibitors (DPP4i) or thiazolidinediones (TZD) as second-line treatment in addition to metformin between 2010 and 2017. .... | 5  |
| sMethod 1. Subgroup analyses .....                                                                                                                                                                                                                             | 6  |
| sTable 2. Comparison of outcome rates between sulphonylureas (SU) and non-SU agents (DPP4i or TZD) in subgroups of cohort stratified by prior history of MACE, age, BMI, and subtypes of SU.....                                                               | 6  |
| sTable 3. Comparison of outcome rates between sulphonylureas (SU) and DPP-4 inhibitors (DPP4i) in subgroups of cohort stratified by prior history of MACE, age, BMI, and subtypes of SU.....                                                                   | 7  |
| sTable 4. Comparison of outcome rates between sulphonylureas (SU) and thiazolidinediones (TZD) in subgroups of cohort stratified by prior history of MACE, age, BMI, and subtypes of SU.....                                                                   | 8  |
| sMethod 2. Sensitivity analyses .....                                                                                                                                                                                                                          | 9  |
| sFigure 5. Illustration of study design for the sensitivity analyses.....                                                                                                                                                                                      | 9  |
| sTable 5. Incidence rates of study outcomes (follow up was additionally censored at adding or switching to a third class of antidiabetic medication).....                                                                                                      | 10 |
| sFigure 6. Comparison of outcome rates between SU and non-SU agents (DPP4i or TZD). .....                                                                                                                                                                      | 11 |
| sFigure 7. Comparison of outcome rates between SU and DPP4i.....                                                                                                                                                                                               | 12 |
| sFigure 8. Comparison of outcome rates between SU and TZD.....                                                                                                                                                                                                 | 13 |
| sMethod 3. Assessment of instrumental variable (IV) conditions.....                                                                                                                                                                                            | 14 |
| sTable 6. Assessment of IV condition (i): IV strength evaluated using likelihood ratio test and point biserial correlation.....                                                                                                                                | 14 |
| sTable 7. Assessment of IV condition (i): IV strength evaluated using logistic regression. ....                                                                                                                                                                | 15 |
| sTable 8. Falsification of IV condition (iii): assessing covariate balance.....                                                                                                                                                                                | 15 |
| sMethod 4. Assessment of proportional hazard assumptions .....                                                                                                                                                                                                 | 17 |
| sTable 9. Plot of Schoenfeld residuals for the comparison between SU vs non-SU agents (DPP4i or TZD).....                                                                                                                                                      | 17 |
| sTable 10. Plot of Schoenfeld residuals for the comparison between SU vs DPP4i.....                                                                                                                                                                            | 18 |
| sTable 11. Plot of Schoenfeld residuals for the comparison between SU vs TZD.....                                                                                                                                                                              | 19 |
| References .....                                                                                                                                                                                                                                               | 20 |

**sFigure 1. Illustration of study design**

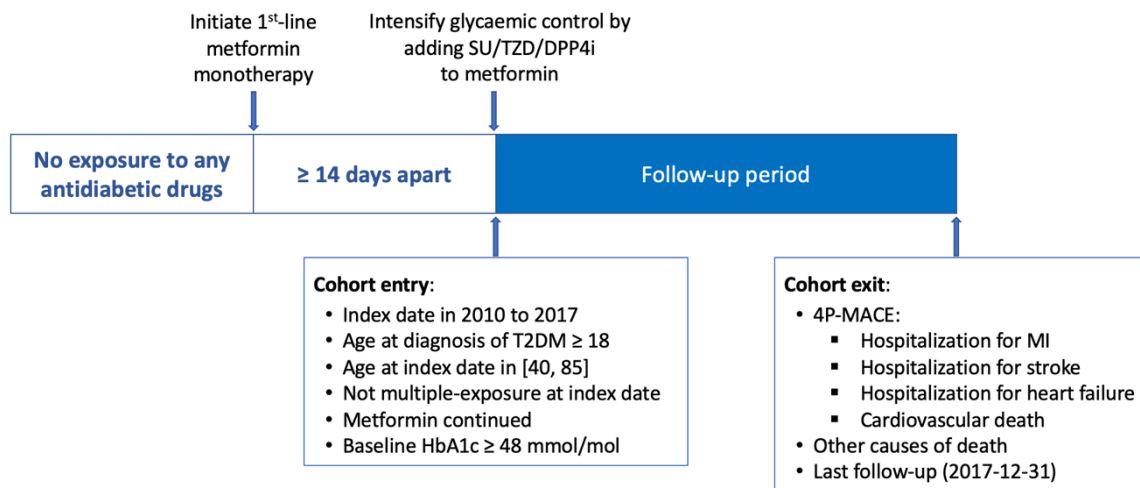

**sFigure 2. Flowchart showing attrition of patients and identification of the study cohort.**

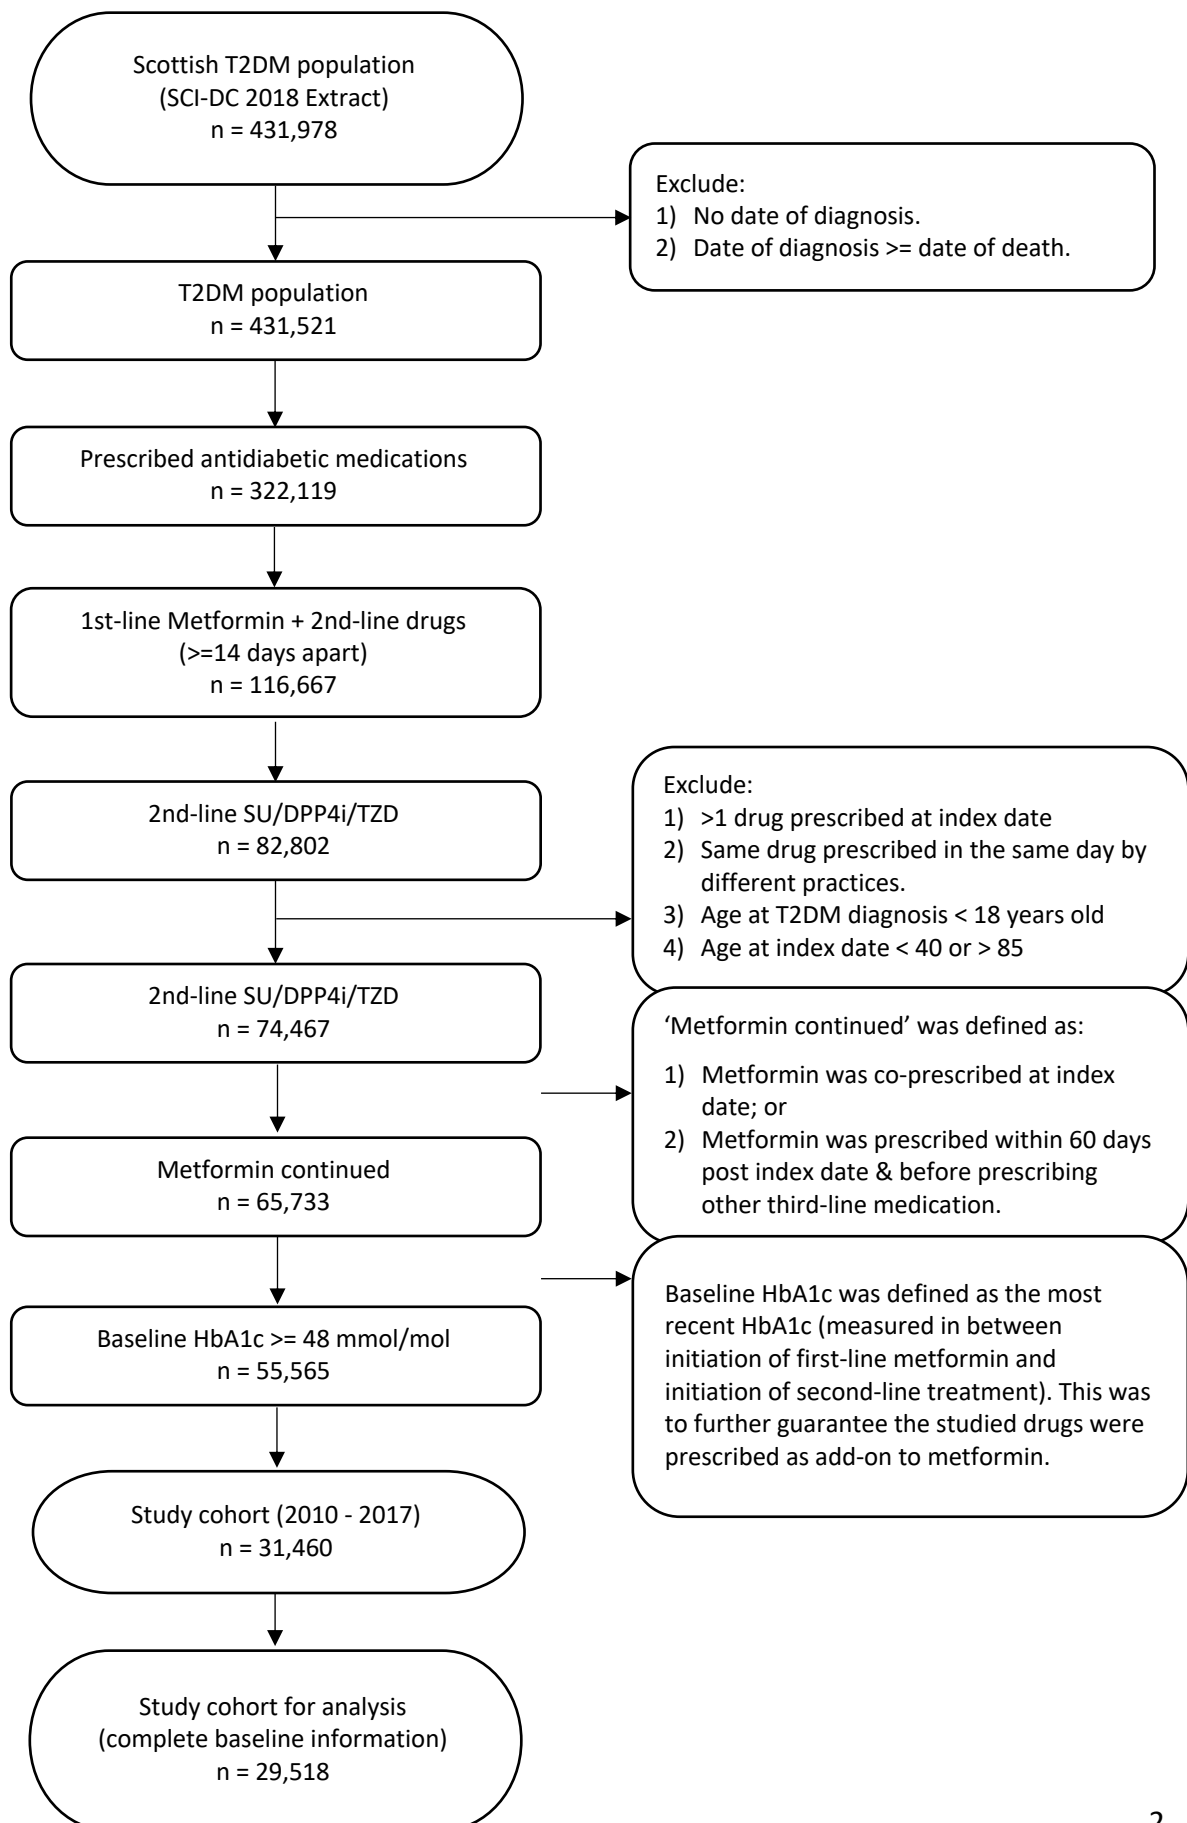

**sFigure 3. Temporal trends of prescribing for second-line treatment in addition to metformin for people with type 2 diabetes in Scotland between 2007 and 2017.**

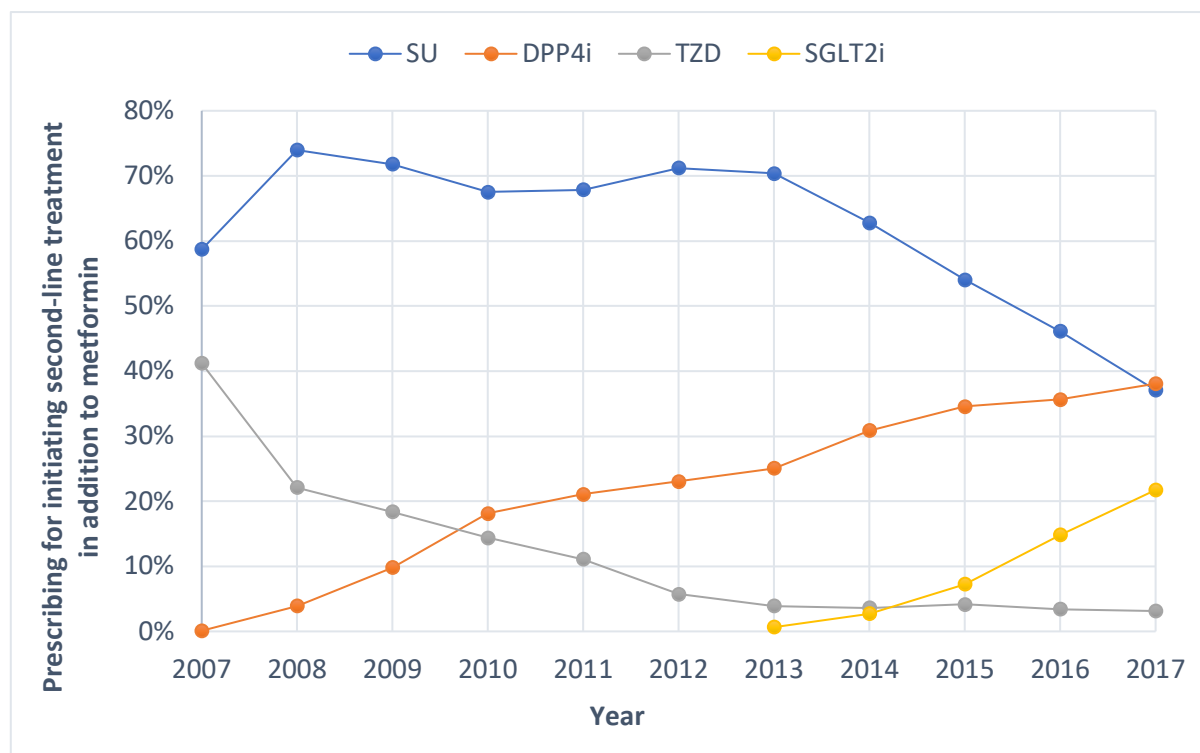

The patterns of prescribing for initiating treatment intensification varied substantially. Between 2010 and 2013, SU accounted for around 70% of all the second-line treatment initiations. This percentage declined dramatically after 2013, and in 2017 SU accounted for 37% of the second-line treatment initiations, slightly less than DPP4i (38%). Prescribing for TZD remained low during the study period with a declining trend from 14% in 2010 to only 3% in 2017. Prescribing for SGLT2i started from 2013 in Scotland and has increased rapidly after guideline recommendation in 2015. In 2017, SGLT2i accounted for nearly 22% of the second-line initiated drugs. However, due to the low absolute number of prescriptions, insufficient follow-up time, and established cardio-protective effects, SGLT2i were not included as one of the comparators in further analyses.

**sFigure 4. Boxplots of practice-level proportion of SU prescribing for initiating second-line treatment in addition to metformin among people with type 2 diabetes in Scotland between 2010 and 2017.**

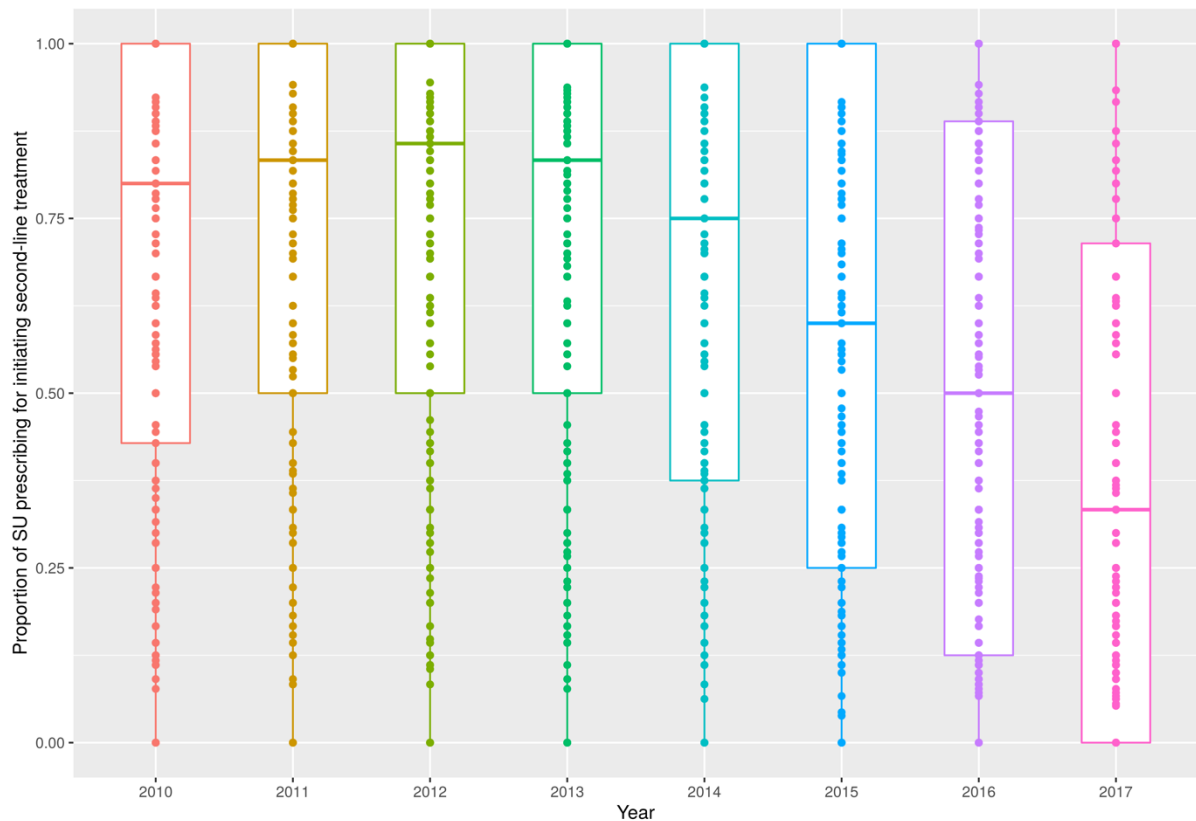

Between-practice variation of SU prescribing for initiating second-line treatment was found to be substantial. Within each year between 2007 to 2017, some practices only prescribed SU, while some others hardly ever prescribed SU. This suggests that the practice-level proportion of SU prescriptions is a good instrument for our IV analyses.

**sTable 1. Incidence rates of study outcomes among people with type 2 diabetes in Scotland treated with sulphonylureas (SU), DPP-4 inhibitors (DPP4i) or thiazolidinediones (TZD) as second-line treatment in addition to metformin between 2010 and 2017.**

|                                          | No. patients | No. events | Person years | Median (IQR) follow-up years | Incidence rate (95% CI) per 1000 person years |
|------------------------------------------|--------------|------------|--------------|------------------------------|-----------------------------------------------|
| <b><u>4P-MACE</u></b>                    |              |            |              |                              |                                               |
| <b>SU</b>                                | 18531        | 1709       | 72958.6      | 3.9 (2.1 to 5.7)             | <b>23.4 (22.3 to 24.6)</b>                    |
| <b>Non-SU</b>                            | 10987        | 701        | 37567.8      | 3.0 (1.5 to 5.2)             | <b>18.7 (17.3 to 20.1)</b>                    |
| <b>DPP4i</b>                             | 9114         | 541        | 28611.9      | 2.8 (1.3 to 4.7)             | <b>18.9 (17.3 to 20.6)</b>                    |
| <b>TZD</b>                               | 1873         | 160        | 8955.8       | 5.3 (2.7 to 6.9)             | <b>17.9 (15.2 to 20.9)</b>                    |
| <b><u>Hospitalization for MI</u></b>     |              |            |              |                              |                                               |
| <b>SU</b>                                | 18531        | 528        | 74233.3      | 4.0 (2.2 to 5.7)             | 7.1 (6.5 to 7.7)                              |
| <b>Non-SU</b>                            | 10987        | 211        | 38063.2      | 3.1 (1.6 to 5.3)             | 5.5 (4.8 to 6.3)                              |
| <b>DPP4i</b>                             | 9114         | 169        | 28965.8      | 2.8 (1.4 to 4.8)             | 5.8 (5.0 to 6.8)                              |
| <b>TZD</b>                               | 1873         | 42         | 9097.4       | 5.5 (2.8 to 6.9)             | 4.6 (3.3 to 6.2)                              |
| <b><u>Hospitalization for stroke</u></b> |              |            |              |                              |                                               |
| <b>SU</b>                                | 18531        | 379        | 74653.0      | 4.1 (2.2 to 5.8)             | 5.1 (4.6 to 5.6)                              |
| <b>Non-SU</b>                            | 10987        | 183        | 38132.2      | 3.1 (1.6 to 5.3)             | 4.8 (4.1 to 5.5)                              |
| <b>DPP4i</b>                             | 9114         | 144        | 29011.5      | 2.8 (1.4 to 4.8)             | 5.0 (4.2 to 5.8)                              |
| <b>TZD</b>                               | 1873         | 39         | 9120.7       | 5.5 (2.8 to 6.9)             | 4.3 (3.0 to 5.8)                              |
| <b><u>Hospitalization for HF</u></b>     |              |            |              |                              |                                               |
| <b>SU</b>                                | 18531        | 257        | 74555.1      | 4.1 (2.2 to 5.8)             | <b>3.4 (3.0 to 3.9)</b>                       |
| <b>Non-SU</b>                            | 10987        | 79         | 38207.5      | 3.1 (1.6 to 5.4)             | <b>2.1 (1.6 to 2.6)</b>                       |
| <b>DPP4i</b>                             | 9114         | 54         | 29112.6      | 2.8 (1.4 to 4.8)             | <b>1.9 (1.4 to 2.4)</b>                       |
| <b>TZD</b>                               | 1873         | 25         | 9094.9       | 5.5 (2.8 to 6.9)             | <b>2.7 (1.8 to 4.1)</b>                       |
| <b><u>Cardiovascular death</u></b>       |              |            |              |                              |                                               |
| <b>SU</b>                                | 18531        | 916        | 75346.1      | 4.1 (2.3 to 5.8)             | 12.2 (11.4 to 13.0)                           |
| <b>Non-SU</b>                            | 10987        | 355        | 38462.5      | 3.1 (1.6 to 5.4)             | 9.2 (8.3 to 10.2)                             |
| <b>DPP4i</b>                             | 9114         | 269        | 29268.8      | 2.8 (1.4 to 4.8)             | 9.2 (8.1 to 10.4)                             |
| <b>TZD</b>                               | 1873         | 86         | 9193.7       | 5.6 (2.9 to 6.9)             | 9.4 (7.5 to 11.6)                             |
| <b><u>All-cause death</u></b>            |              |            |              |                              |                                               |
| <b>SU</b>                                | 18531        | 1601       | 75346.1      | 4.1 (2.3 to 5.8)             | 21.2 (20.2 to 22.3)                           |
| <b>Non-SU</b>                            | 10987        | 618        | 38462.5      | 3.1 (1.6 to 5.4)             | 16.1 (14.8 to 17.4)                           |
| <b>DPP4i</b>                             | 9114         | 469        | 29268.8      | 2.8 (1.4 to 4.8)             | 16.0 (14.6 to 17.5)                           |
| <b>TZD</b>                               | 1873         | 149        | 9193.7       | 5.6 (2.9 to 6.9)             | 16.2 (13.7 to 19.0)                           |

## sMethod 1. Subgroup analyses

**sTable 2. Comparison of outcome rates between sulphonylureas (SU) and non-SU agents (DPP4i or TZD) in subgroups of cohort stratified by prior history of MACE, age, BMI, and subtypes of SU.**

|                               | <b>4P-MACE</b>      | <b>Hospitalization<br/>for MI</b> | <b>Hospitalization<br/>for stroke</b> | <b>Hospitalization<br/>for heart failure</b> | <b>Cardiovascular<br/>death</b> | <b>All-cause death</b> |
|-------------------------------|---------------------|-----------------------------------|---------------------------------------|----------------------------------------------|---------------------------------|------------------------|
| <b>MACE history</b>           |                     |                                   |                                       |                                              |                                 |                        |
| No prior MACE<br>(n = 25,943) | 1.05 (0.94 to 1.17) | 1.19 (0.98 to 1.44)               | 0.89 (0.72 to 1.10)                   | 1.37 (0.97 to 1.93)                          | 1.05 (0.90 to 1.24)             | 1.05 (0.94 to 1.18)    |
| Prior MACE (n = 3,575)        | 0.89 (0.75 to 1.05) | 0.86 (0.63 to 1.18)               | 0.73 (0.52 to 1.03)                   | 0.95 (0.67 to 1.34)                          | 0.87 (0.70 to 1.08)             | 0.93 (0.77 to 1.12)    |
| <b>Age group</b>              |                     |                                   |                                       |                                              |                                 |                        |
| Age < 70 (n = 22,985)         | 0.97 (0.86 to 1.10) | 1.09 (0.89 to 1.32)               | 0.88 (0.69 to 1.13)                   | 1.20 (0.85 to 1.72)                          | 0.95 (0.80 to 1.14)             | 1.04 (0.91 to 1.19)    |
| Age ≥ 70 (n = 6,533)          | 1.04 (0.89 to 1.20) | 1.10 (0.80 to 1.50)               | 0.78 (0.59 to 1.02)                   | 1.16 (0.80 to 1.67)                          | 1.02 (0.85 to 1.22)             | 1.01 (0.88 to 1.16)    |
| <b>BMI category</b>           |                     |                                   |                                       |                                              |                                 |                        |
| BMI < 30 (n = 9,811)          | 1.06 (0.91 to 1.23) | 1.23 (0.93 to 1.63)               | 0.78 (0.59 to 1.04)                   | 1.52 (0.88 to 2.64)                          | 1.07 (0.87 to 1.32)             | 1.03 (0.88 to 1.21)    |
| BMI ≥ 30 (n = 19,707)         | 0.97 (0.87 to 1.09) | 1.04 (0.85 to 1.28)               | 0.86 (0.70 to 1.06)                   | 1.10 (0.83 to 1.46)                          | 0.96 (0.82 to 1.12)             | 1.04 (0.92 to 1.17)    |
| <b>Subtypes of SU</b>         |                     |                                   |                                       |                                              |                                 |                        |
| Gliclazide (n = 16,152)       | 1.01 (0.93 to 1.10) | 1.12 (0.94 to 1.33)               | 0.85 (0.71 to 1.01)                   | 1.18 (0.92 to 1.51)                          | 1.00 (0.88 to 1.13)             | 1.04 (0.95 to 1.15)    |
| Glimepiride (n = 1,540)       | 0.94 (0.77 to 1.16) | 1.00 (0.67 to 1.50)               | 0.77 (0.47 to 1.25)                   | 1.16 (0.69 to 1.95)                          | 0.98 (0.75 to 1.28)             | 0.96 (0.77 to 1.19)    |
| Glipizide (n = 818)           | 0.93 (0.75 to 1.16) | 0.81 (0.50 to 1.32)               | 0.68 (0.40 to 1.14)                   | 1.17 (0.63 to 2.18)                          | 1.02 (0.77 to 1.35)             | 0.97 (0.77 to 1.22)    |
| Glibenclamide* (n = 21)       | (--)                | (--)                              | (--)                                  | (--)                                         | (--)                            | (--)                   |

\*Hazard ratios for glibenclamide were not evaluated due to the extremely small sample size.

**sTable 3. Comparison of outcome rates between sulphonylureas (SU) and DPP-4 inhibitors (DPP4i) in subgroups of cohort stratified by prior history of MACE, age, BMI, and subtypes of SU.**

|                               | <b>4P-MACE</b>      | <b>Hospitalization<br/>for MI</b> | <b>Hospitalization<br/>for stroke</b> | <b>Hospitalization<br/>for heart failure</b> | <b>Cardiovascular<br/>death</b> | <b>All-cause death</b> |
|-------------------------------|---------------------|-----------------------------------|---------------------------------------|----------------------------------------------|---------------------------------|------------------------|
| <b>MACE history</b>           |                     |                                   |                                       |                                              |                                 |                        |
| No prior MACE<br>(n = 24,277) | 1.02 (0.91 to 1.16) | 1.14 (0.92 to 1.42)               | 0.85 (0.67 to 1.08)                   | 1.28 (0.87 to 1.90)                          | 1.05 (0.88 to 1.26)             | 1.03 (0.91 to 1.17)    |
| Prior MACE (n = 3,444)        | 0.89 (0.75 to 1.06) | 0.84 (0.60 to 1.18)               | 0.70 (0.48 to 1.01)                   | 1.10 (0.74 to 1.63)                          | 0.86 (0.68 to 1.09)             | 0.92 (0.75 to 1.12)    |
| <b>Age group</b>              |                     |                                   |                                       |                                              |                                 |                        |
| Age < 70 (n = 21,436)         | 0.94 (0.82 to 1.07) | 1.04 (0.83 to 1.31)               | 0.86 (0.66 to 1.14)                   | 1.14 (0.77 to 1.69)                          | 0.92 (0.75 to 1.12)             | 1.02 (0.87 to 1.18)    |
| Age >= 70 (n = 6,209)         | 1.05 (0.89 to 1.23) | 1.05 (0.75 to 1.46)               | 0.72 (0.53 to 0.97)                   | 1.30 (0.85 to 1.97)                          | 1.03 (0.84 to 1.26)             | 0.99 (0.85 to 1.16)    |
| <b>BMI category</b>           |                     |                                   |                                       |                                              |                                 |                        |
| BMI < 30 (n = 9,245)          | 1.05 (0.88 to 1.25) | 1.27 (0.92 to 1.76)               | 0.66 (0.48 to 0.91)                   | 1.95 (0.94 to 4.06)                          | 1.05 (0.83 to 1.34)             | 1.02 (0.85 to 1.22)    |
| BMI >= 30 (n = 18,400)        | 0.95 (0.84 to 1.08) | 0.97 (0.78 to 1.22)               | 0.88 (0.69 to 1.11)                   | 1.07 (0.78 to 1.47)                          | 0.96 (0.80 to 1.14)             | 1.01 (0.89 to 1.15)    |
| <b>Subtypes of SU</b>         |                     |                                   |                                       |                                              |                                 |                        |
| Gliclazide (n = 16,152)       | 0.99 (0.89 to 1.09) | 1.07 (0.88 to 1.30)               | 0.80 (0.66 to 0.97)                   | 1.19 (0.90 to 1.57)                          | 0.98 (0.85 to 1.13)             | 1.02 (0.92 to 1.14)    |
| Glimepiride (n = 1,540)       | 0.95 (0.77 to 1.17) | 0.98 (0.64 to 1.49)               | 0.71 (0.42 to 1.18)                   | 1.28 (0.73 to 2.23)                          | 0.99 (0.75 to 1.30)             | 0.93 (0.75 to 1.16)    |
| Glipizide (n = 818)           | 0.91 (0.72 to 1.15) | 0.76 (0.46 to 1.26)               | 0.62 (0.36 to 1.06)                   | 1.33 (0.72 to 2.46)                          | 1.02 (0.76 to 1.37)             | 0.95 (0.75 to 1.21)    |
| Glibenclamide* (n = 21)       | (--)                | (--)                              | (--)                                  | (--)                                         | (--)                            | (--)                   |

\*Hazard ratios for glibenclamide were not evaluated due to the extremely small sample size.



**sTable 4. Comparison of outcome rates between sulphonylureas (SU) and thiazolidinediones (TZD) in subgroups of cohort stratified by prior history of MACE, age, BMI, and subtypes of SU.**

|                            | <b>4P-MACE</b>      | <b>Hospitalization for MI</b> | <b>Hospitalization for stroke</b> | <b>Hospitalization for heart failure</b> | <b>Cardiovascular death</b> | <b>All-cause death</b> |
|----------------------------|---------------------|-------------------------------|-----------------------------------|------------------------------------------|-----------------------------|------------------------|
| <b>MACE history</b>        |                     |                               |                                   |                                          |                             |                        |
| No prior MACE (n = 17,939) | 1.11 (0.92 to 1.34) | 1.32 (0.94 to 1.85)           | 1.01 (0.68 to 1.51)               | 1.55 (0.85 to 2.81)                      | 1.07 (0.81 to 1.42)         | 1.10 (0.91 to 1.34)    |
| Prior MACE (n = 2,465)     | 0.87 (0.60 to 1.28) | 0.98 (0.48 to 2.01)           | 0.83 (0.39 to 1.76)               | 0.62 (0.31 to 1.24)                      | 0.90 (0.56 to 1.44)         | 0.96 (0.64 to 1.42)    |
| <b>Age group</b>           |                     |                               |                                   |                                          |                             |                        |
| Age < 70 (n = 15,753)      | 1.13 (0.93 to 1.37) | 1.22 (0.86 to 1.73)           | 0.96 (0.61 to 1.51)               | 1.48 (0.81 to 2.70)                      | 1.13 (0.84 to 1.52)         | 1.10 (0.87 to 1.40)    |
| Age >= 70 (n = 4,651)      | 1.01 (0.76 to 1.34) | 1.30 (0.69 to 2.44)           | 0.99 (0.58 to 1.71)               | 0.94 (0.52 to 1.72)                      | 1.00 (0.71 to 1.40)         | 1.07 (0.82 to 1.39)    |
| <b>BMI category</b>        |                     |                               |                                   |                                          |                             |                        |
| BMI < 30 (n = 7,314)       | 1.07 (0.81 to 1.41) | 1.12 (0.68 to 1.84)           | 1.29 (0.69 to 2.39)               | 1.08 (0.49 to 2.41)                      | 1.10 (0.76 to 1.61)         | 1.02 (0.77 to 1.36)    |
| BMI >= 30 (n = 13,090)     | 1.09 (0.89 to 1.33) | 1.35 (0.89 to 2.04)           | 0.85 (0.57 to 1.27)               | 1.24 (0.76 to 2.04)                      | 1.05 (0.80 to 1.37)         | 1.15 (0.94 to 1.41)    |
| <b>Subtypes of SU</b>      |                     |                               |                                   |                                          |                             |                        |
| Gliclazide (n = 16,152)    | 1.09 (0.93 to 1.29) | 1.30 (0.95 to 1.77)           | 1.00 (0.70 to 1.43)               | 1.18 (0.76 to 1.81)                      | 1.05 (0.84 to 1.32)         | 1.10 (0.93 to 1.30)    |
| Glimepiride (n = 1,540)    | 0.94 (0.72 to 1.22) | 1.13 (0.70 to 1.82)           | 0.90 (0.51 to 1.59)               | 1.12 (0.54 to 2.32)                      | 0.89 (0.61 to 1.28)         | 0.96 (0.74 to 1.25)    |
| Glipizide (n = 818)        | 1.10 (0.78 to 1.30) | 1.06 (0.63 to 1.79)           | 0.88 (0.48 to 1.60)               | 0.95 (0.44 to 2.08)                      | 1.10 (0.78 to 1.57)         | 1.02 (0.77 to 1.35)    |
| Glibenclamide (n = 21)     | (--)                | (--)                          | (--)                              | (--)                                     | (--)                        | (--)                   |

\*Hazard ratios for glibenclamide were not evaluated due to the extremely small sample size.

## sMethod 2. Sensitivity analyses

In the sensitivity analyses, follow-up was additionally censored at adding or switching to a third class of antidiabetic medication (different from metformin and the second-line treatment currently received). Please see the sFigure 3 below for details.

**sFigure 5. Illustration of study design for the sensitivity analyses.**

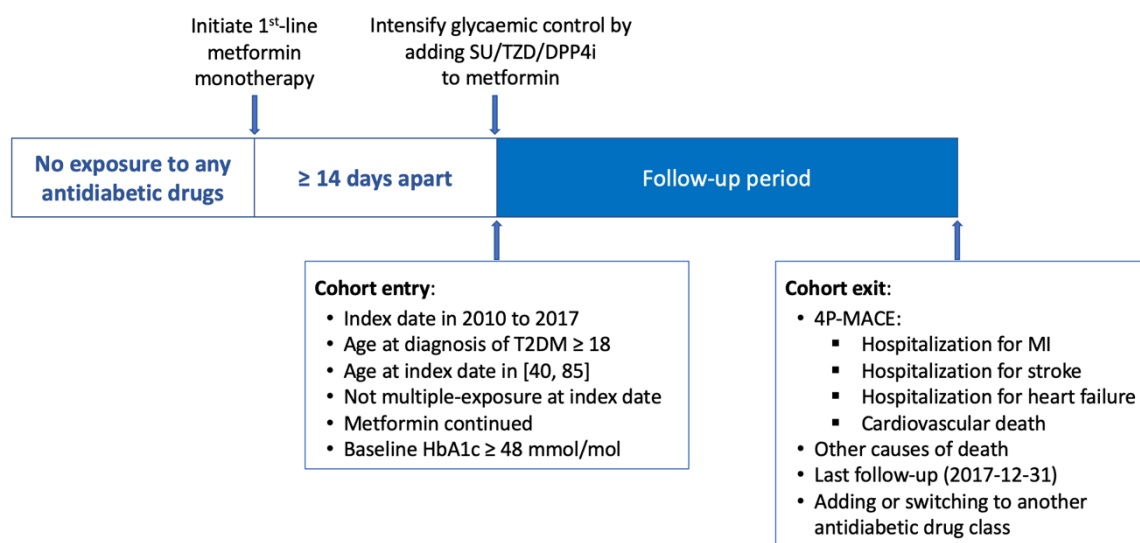

**sTable 5. Incidence rates of study outcomes (follow up was additionally censored at adding or switching to a third class of antidiabetic medication).**

|                                          | No. patients | No. events | Person years | Median (IQR) follow-up years | Incidence rate (95% CI) per 1000 person years |
|------------------------------------------|--------------|------------|--------------|------------------------------|-----------------------------------------------|
| <b><u>4P-MACE</u></b>                    |              |            |              |                              |                                               |
| <b>SU</b>                                | 18531        | 998        | 42623.9      | 1.8 (0.6 to 3.6)             | <b>23.4 (22.0 to 24.9)</b>                    |
| <b>Non-SU</b>                            | 10987        | 361        | 21793.9      | 1.4 (0.6 to 2.8)             | <b>16.6 (14.9 to 18.4)</b>                    |
| <b>DPP4i</b>                             | 9114         | 280        | 16625.7      | 1.3 (0.6 to 2.6)             | <b>16.8 (14.9 to 18.9)</b>                    |
| <b>TZD</b>                               | 1873         | 80         | 5168.3       | 2.1 (0.8 to 4.5)             | <b>15.5 (12.3 to 19.3)</b>                    |
| <b><u>Hospitalization for MI</u></b>     |              |            |              |                              |                                               |
| <b>SU</b>                                | 18531        | 303        | 43236.8      | 1.9 (0.6 to 3.7)             | 7.0 (6.2 to 7.8)                              |
| <b>Non-SU</b>                            | 10987        | 111        | 21999.6      | 1.4 (0.6 to 2.8)             | 5.0 (4.2 to 6.1)                              |
| <b>DPP4i</b>                             | 9114         | 90         | 16775.1      | 1.3 (0.6 to 2.6)             | 5.4 (4.3 to 6.6)                              |
| <b>TZD</b>                               | 1873         | 21         | 5224.5       | 2.1 (0.8 to 4.6)             | 4.0 (2.5 to 6.1)                              |
| <b><u>Hospitalization for stroke</u></b> |              |            |              |                              |                                               |
| <b>SU</b>                                | 18531        | 223        | 43364.0      | 1.9 (0.6 to 3.7)             | 5.1 (4.5 to 5.9)                              |
| <b>Non-SU</b>                            | 10987        | 86         | 21986.5      | 1.4 (0.6 to 2.8)             | 3.9 (3.1 to 4.8)                              |
| <b>DPP4i</b>                             | 9114         | 69         | 16756.1      | 1.3 (0.6 to 2.6)             | 4.1 (3.2 to 5.2)                              |
| <b>TZD</b>                               | 1873         | 17         | 5230.4       | 2.1 (0.8 to 4.6)             | 3.3 (1.9 to 5.2)                              |
| <b><u>Hospitalization for HF</u></b>     |              |            |              |                              |                                               |
| <b>SU</b>                                | 18531        | 176        | 43333.4      | 1.9 (0.6 to 3.7)             | <b>4.1 (3.5 to 4.7)</b>                       |
| <b>Non-SU</b>                            | 10987        | 50         | 22027.5      | 1.4 (0.6 to 2.8)             | <b>2.3 (1.7 to 3.0)</b>                       |
| <b>DPP4i</b>                             | 9114         | 35         | 16809.1      | 1.3 (0.6 to 2.6)             | <b>2.1 (1.5 to 2.9)</b>                       |
| <b>TZD</b>                               | 1873         | 15         | 5218.4       | 2.1 (0.8 to 4.6)             | <b>2.9 (1.6 to 4.7)</b>                       |
| <b><u>Cardiovascular death</u></b>       |              |            |              |                              |                                               |
| <b>SU</b>                                | 18531        | 510        | 43701.3      | 1.9 (0.6 to 3.7)             | 11.7 (10.7 to 12.7)                           |
| <b>Non-SU</b>                            | 10987        | 174        | 22121.6      | 1.4 (0.6 to 2.9)             | 7.9 (6.7 to 9.1)                              |
| <b>DPP4i</b>                             | 9114         | 136        | 16867.0      | 1.3 (0.6 to 2.6)             | 8.1 (6.8 to 9.5)                              |
| <b>TZD</b>                               | 1873         | 38         | 5254.6       | 2.1 (0.8 to 4.6)             | 7.2 (5.1 to 9.9)                              |
| <b><u>All-cause death</u></b>            |              |            |              |                              |                                               |
| <b>SU</b>                                | 18531        | 871        | 43701.3      | 1.9 (0.6 to 3.7)             | 19.9 (18.6 to 21.3)                           |
| <b>Non-SU</b>                            | 10987        | 301        | 22121.6      | 1.4 (0.6 to 2.9)             | 13.6 (12.1 to 15.2)                           |
| <b>DPP4i</b>                             | 9114         | 230        | 16867.0      | 1.3 (0.6 to 2.6)             | 13.6 (11.9 to 15.5)                           |
| <b>TZD</b>                               | 1873         | 71         | 5254.6       | 2.1 (0.8 to 4.6)             | 13.5 (10.6 to 17.0)                           |

**sFigure 6. Comparison of outcome rates between SU and non-SU agents (DPP4i or TZD).**

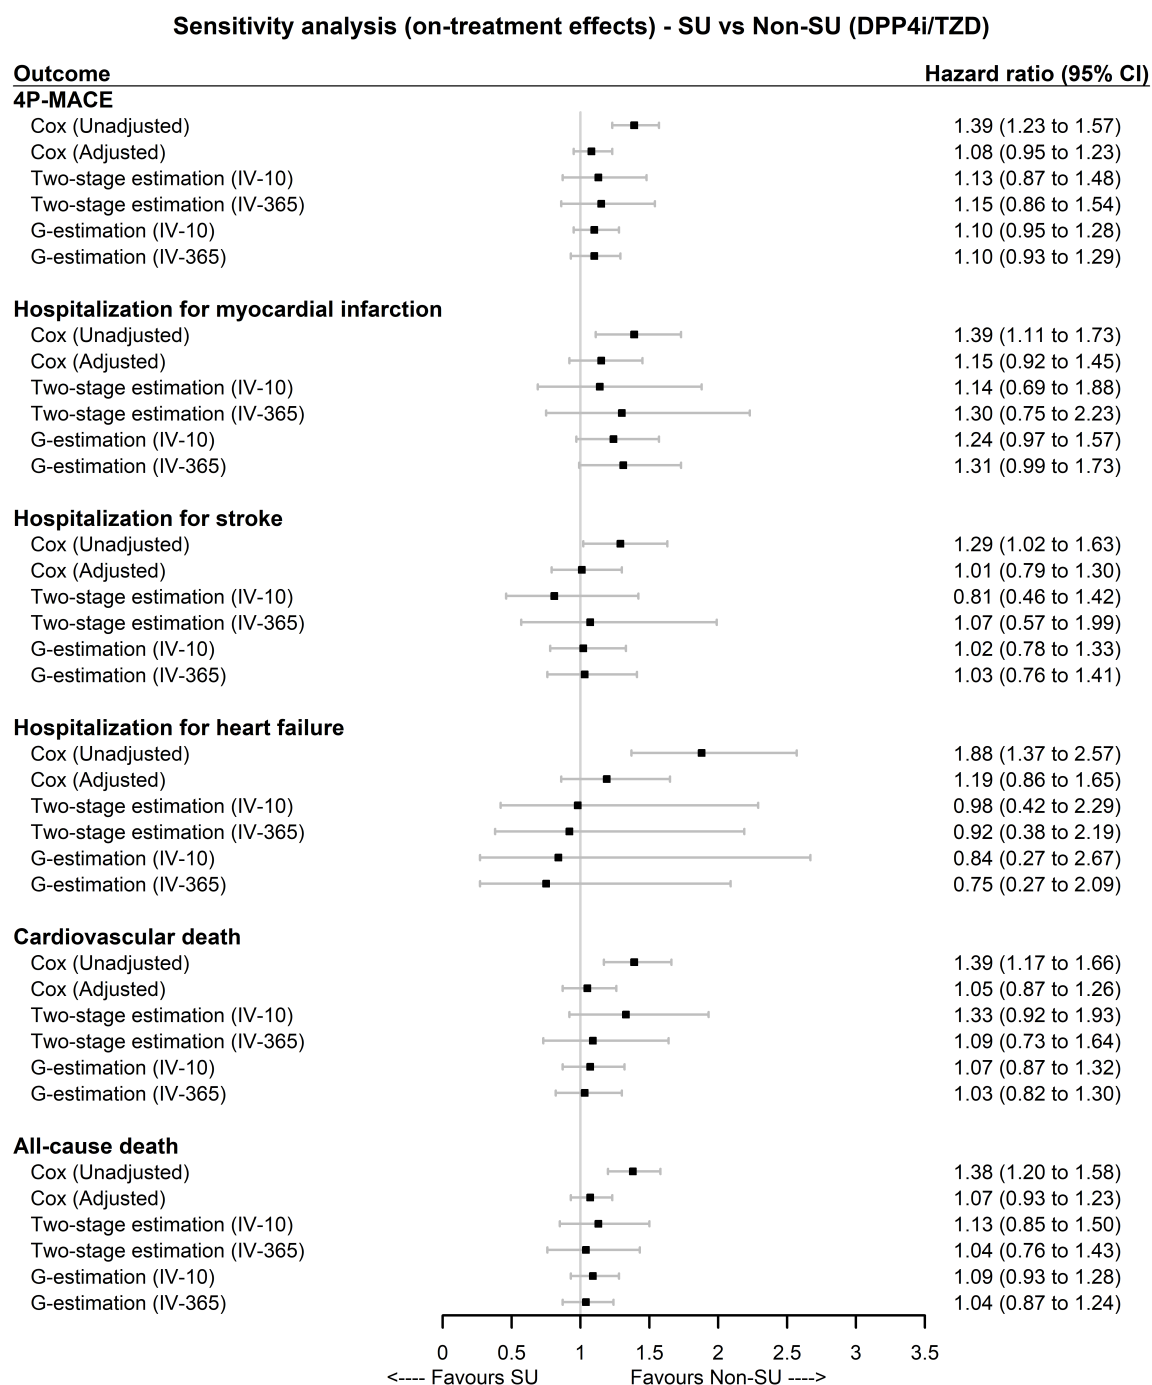

**sFigure 7. Comparison of outcome rates between SU and DPP4i.**

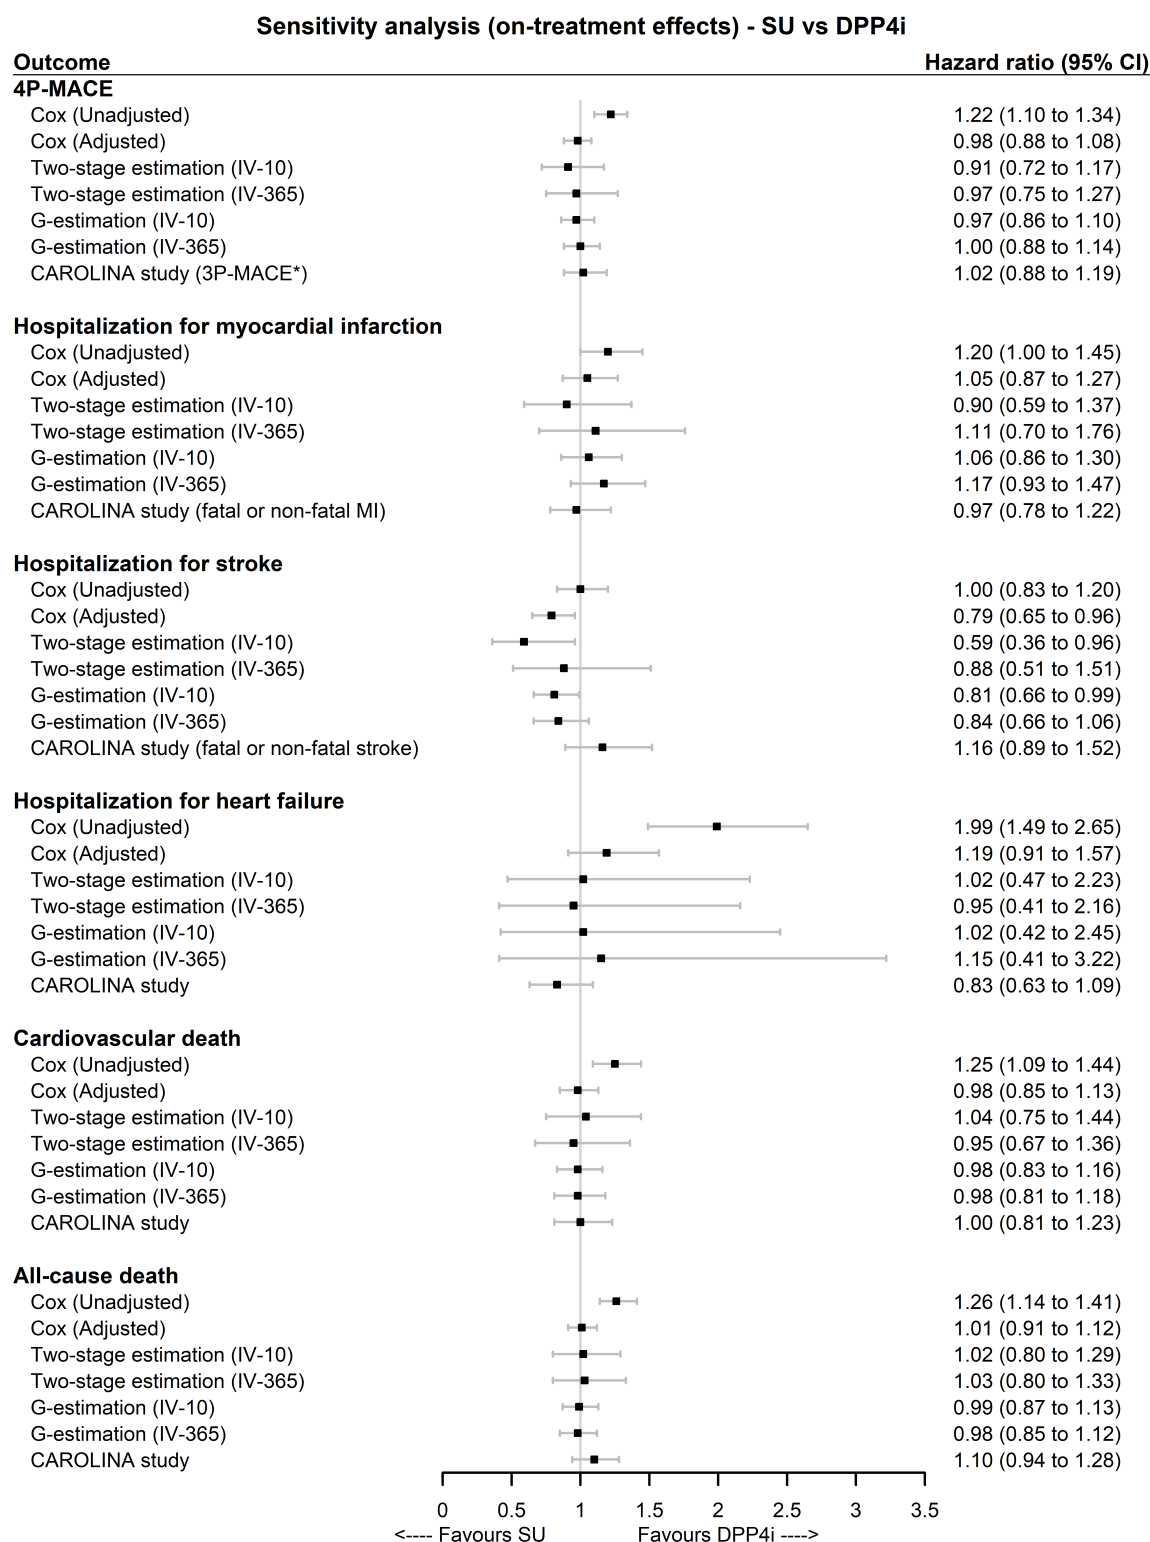

**sFigure 8. Comparison of outcome rates between SU and TZD.**

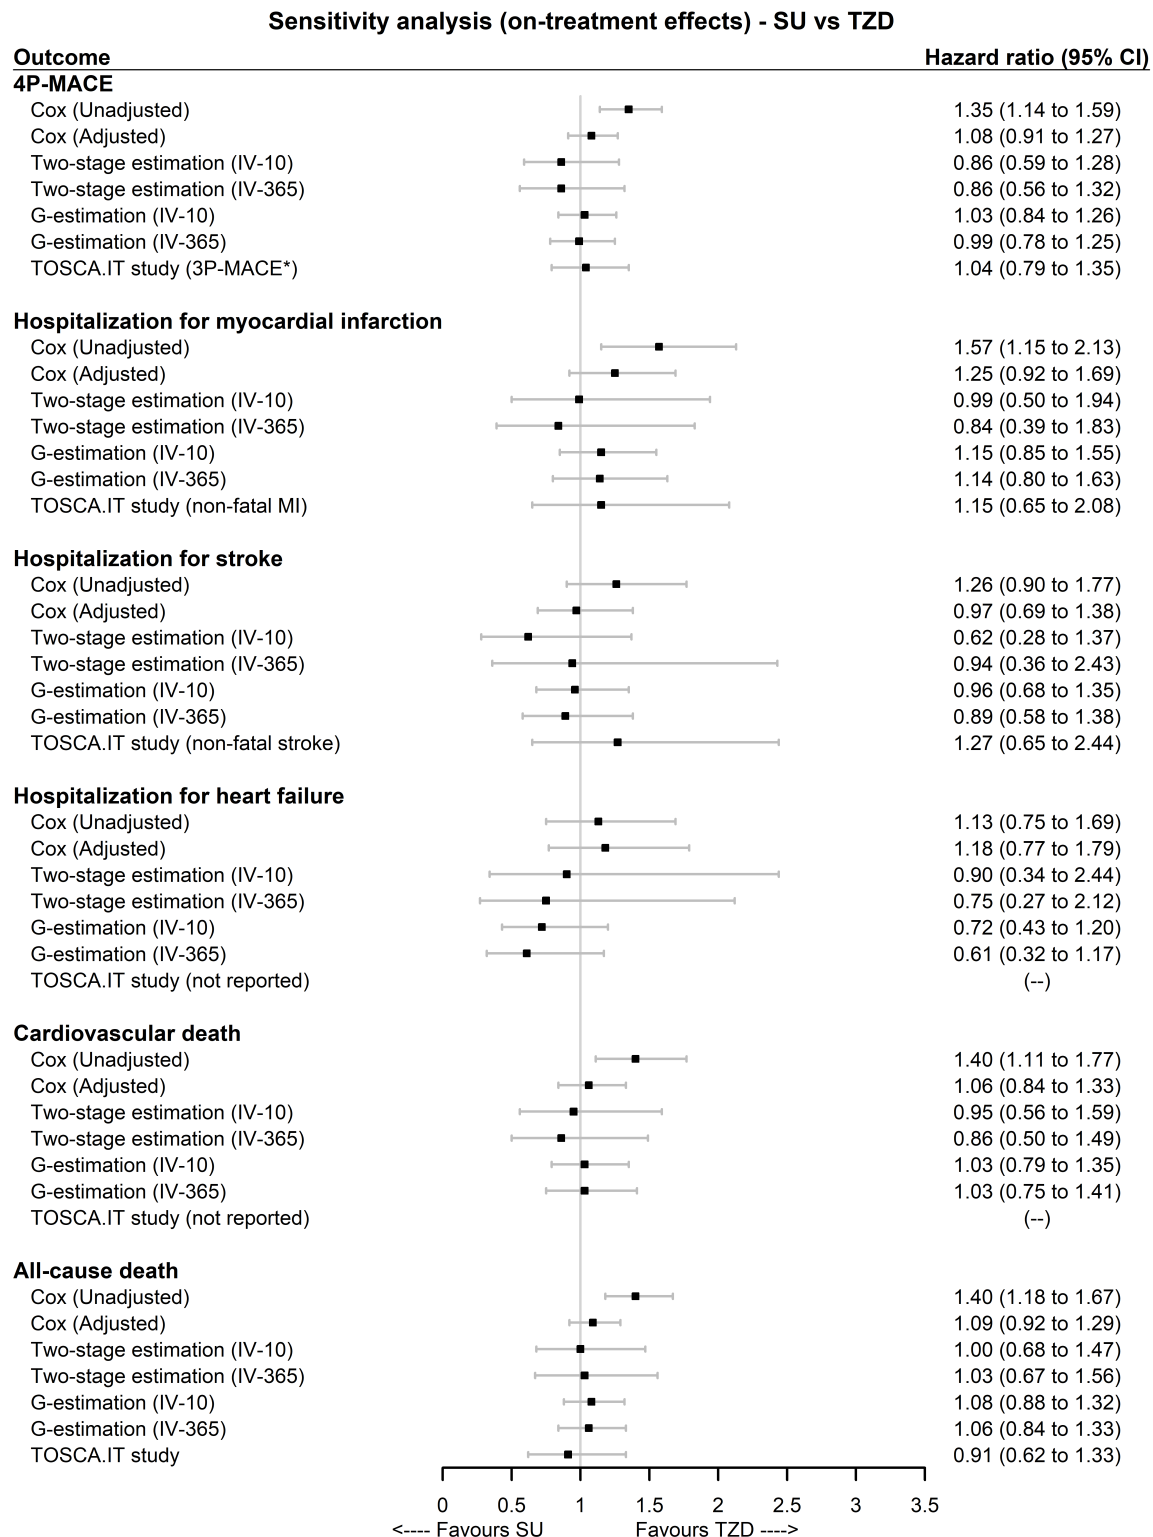

### sMethod 3. Assessment of instrumental variable (IV) conditions

The three essential IV conditions are: (i) 'Relevance' – the IV is associated with the exposure of interest; (ii) 'Exclusion restriction' – the IV does not affect the outcome except through its potential effect on the exposure; and (iii) 'Exchangeability' – the IV and the outcome have no common causes. For the proposed two IVs, condition (i) was tested under the two-stage setting by performing likelihood ratio test, analogous to reporting the partial  $F$  statistic for the linear framework. Point-biserial correlation was used to quantify the strength of the IVs. Moreover, logistic regression models were built with SU prescription as the outcome, regressing on the z-transformed IV with and without including year of cohort entry. The strength of the IV can be assured if the odds ratio of the z-transformed IV remains large with or without including year of cohort entry. Condition (ii) was assumed to be met because the prescribing preference at practice level was unlikely to affect a new patient's CV risk or mortality other than through the actual prescription issued. Condition (iii) was falsified by using the standardized difference (SDif), an intuitive measure for assessing covariates balance. If measured covariates are well balanced, it is reasonable to assume that such balance may also be achieved in the potential unmeasured confounders.(1) As our IVs are continuous proportions, the balance was assessed across the quartiles. The maximum SDif for each covariate was reported, with small values (e.g.  $< 0.1$ ) indicating better balance.(2)

In addition to the three essential IV conditions above, obtaining a point estimate for the causal exposure effect requires a further fourth condition of either treatment effect homogeneity or monotonicity.(3) Here we assumed the monotonicity was established, that is, all study participants were assumed to comply with the preference of their practices. In other words, patients registered with a practice with stronger preference for a given drug would be more likely to receive that drug in comparison to the other drugs. Under this assumption, the estimated exposure effect would be interpreted as the average causal effect in those who complied with practice preference (also known as the local average treatment effect).

**sTable 6. Assessment of IV condition (i): IV strength evaluated using likelihood ratio test and point biserial correlation.**

| Instrumental variable | Deviance of the first stage model <sup>1</sup> |         | Likelihood ratio test<br>$p$ value | Point-biserial correlation |
|-----------------------|------------------------------------------------|---------|------------------------------------|----------------------------|
|                       | Without IV                                     | With IV |                                    |                            |
| IV-10                 | 35467                                          | 28829   | $< 0.001$                          | 0.497                      |
| IV-365                | 27111                                          | 21697   | $< 0.001$                          | 0.516                      |

<sup>1</sup>First stage model: Exposure to SU (yes/no) ~ Instrument (IV-10 or IV-365) + year of cohort entry.

**sTable 7. Assessment of IV condition (i): IV strength evaluated using logistic regression.**

| Instrumental variable | Crude odds ratio <sup>1</sup> (95% CI) | Adjusted odds ratio <sup>2</sup> (95% CI) | p value (Wald's test) | p value (Likelihood ratio test) |
|-----------------------|----------------------------------------|-------------------------------------------|-----------------------|---------------------------------|
| <b>IV-10</b>          | 3.25 (3.15 – 3.36)                     | 3.19 (3.09 – 3.29)                        | < 0.001               | < 0.001                         |
| <b>IV-365</b>         | 3.45 (3.33 – 3.58)                     | 3.39 (3.26 – 3.52)                        | < 0.001               | < 0.001                         |

<sup>1</sup>Crude odds ratios were obtained from the univariate logistic model: Exposure to SU (yes/no) ~ z-transformed Instrument (IV-10 or IV-365).

<sup>2</sup>Adjusted odds ratios were obtained from the multivariate logistic model: Exposure to SU (yes/no) ~ z-transformed Instrument (IV-10 or IV-365) + year of cohort entry.

**sTable 8. Falsification of IV condition (iii): assessing covariate balance.**

|                                           | Standardised mean difference (SDif) | Maximum pairwise standardised mean difference (SDif) across IV quartiles |        |
|-------------------------------------------|-------------------------------------|--------------------------------------------------------------------------|--------|
| Covariates                                | Exposure (SU vs non-SU)             | IV-10                                                                    | IV-365 |
| <b>Age</b>                                | <u><b>0.105</b></u>                 | 0.053                                                                    | 0.064  |
| <b>Sex</b>                                | 0.009                               | 0.007                                                                    | 0.015  |
| <b>Ethnicity</b>                          | 0.022                               | 0.053                                                                    | 0.041  |
| <b>Duration of diabetes</b>               | -0.014                              | 0.029                                                                    | 0.051  |
| <b>HbA1c</b>                              | <u><b>0.220</b></u>                 | 0.098                                                                    | 0.097  |
| <b>Total cholesterol/HDL ratio</b>        | 0.044                               | 0.065                                                                    | 0.093  |
| <b>Systolic blood pressure</b>            | -0.012                              | 0.044                                                                    | 0.071  |
| <b>Baseline eGFR (CKD-EPI)</b>            |                                     |                                                                          |        |
| <b>≥90</b>                                | -0.011                              | 0.033                                                                    | 0.037  |
| <b>60-89</b>                              | 0.006                               | 0.027                                                                    | 0.019  |
| <b>45-59</b>                              | 0.004                               | 0.004                                                                    | 0.015  |
| <b>&lt;45</b>                             | 0.002                               | 0.005                                                                    | 0.007  |
| <b>Body mass index (kg/m<sup>2</sup>)</b> |                                     |                                                                          |        |
| <b>&lt;25</b>                             | 0.032                               | 0.003                                                                    | 0.008  |
| <b>25-29</b>                              | 0.053                               | 0.009                                                                    | 0.013  |
| <b>30-34</b>                              | -0.004                              | 0.009                                                                    | 0.006  |
| <b>35-40</b>                              | -0.031                              | 0.010                                                                    | 0.008  |
| <b>≥40</b>                                | -0.050                              | 0.008                                                                    | 0.009  |
| <b>Smoking status</b>                     |                                     |                                                                          |        |
| <b>Never</b>                              | -0.026                              | 0.009                                                                    | 0.012  |
| <b>Ever</b>                               | -0.001                              | 0.011                                                                    | 0.009  |
| <b>Current</b>                            | 0.027                               | 0.017                                                                    | 0.017  |
| <b>SIMD quintile</b>                      |                                     |                                                                          |        |
| <b>1</b>                                  | -0.011                              | 0.029                                                                    | 0.023  |



|                                 |        |       |       |
|---------------------------------|--------|-------|-------|
| <b>2</b>                        | -0.012 | 0.023 | 0.020 |
| <b>3</b>                        | 0.008  | 0.026 | 0.005 |
| <b>4</b>                        | 0.006  | 0.015 | 0.020 |
| <b>5</b>                        | 0.010  | 0.014 | 0.017 |
| <b>History of conditions:</b>   |        |       |       |
| <b>Arterial fibrillations</b>   | 0.009  | 0.004 | 0.003 |
| <b>Coronary artery disease</b>  | 0.025  | 0.007 | 0.005 |
| <b>Cancer</b>                   | 0.018  | 0.008 | 0.011 |
| <b>COPD</b>                     | 0.013  | 0.008 | 0.014 |
| <b>Diabetic retinopathy</b>     | 0.012  | 0.032 | 0.025 |
| <b>Hypertension (ICD-coded)</b> | 0.021  | 0.011 | 0.010 |
| <b>Myocardial infarction</b>    | 0.011  | 0.009 | 0.002 |
| <b>Stroke</b>                   | 0.004  | 0.004 | 0.005 |
| <b>Heart failure</b>            | 0.010  | 0.002 | 0.001 |
| <b>Currently used drugs:</b>    |        |       |       |
| <b>ACEis/ARBs</b>               | -0.021 | 0.014 | 0.009 |
| <b>Beta blockers</b>            | 0.024  | 0.017 | 0.015 |
| <b>Calcium channel blockers</b> | -0.004 | 0.011 | 0.024 |
| <b>Diuretics</b>                | 0.013  | 0.008 | 0.009 |
| <b>Cardiac glycosides</b>       | 0.006  | 0.003 | 0.005 |
| <b>Nitrates</b>                 | 0.011  | 0.002 | 0.003 |
| <b>Oral anticoagulants</b>      | 0.005  | 0.004 | 0.004 |
| <b>Antiplatelets</b>            | 0.041  | 0.031 | 0.026 |
| <b>Lipid lowering drugs</b>     | -0.008 | 0.009 | 0.010 |

## sMethod 4. Assessment of proportional hazard assumptions

sTable 9. Plot of Schoenfeld residuals for the comparison between SU vs non-SU agents (DPP4i or TZD).

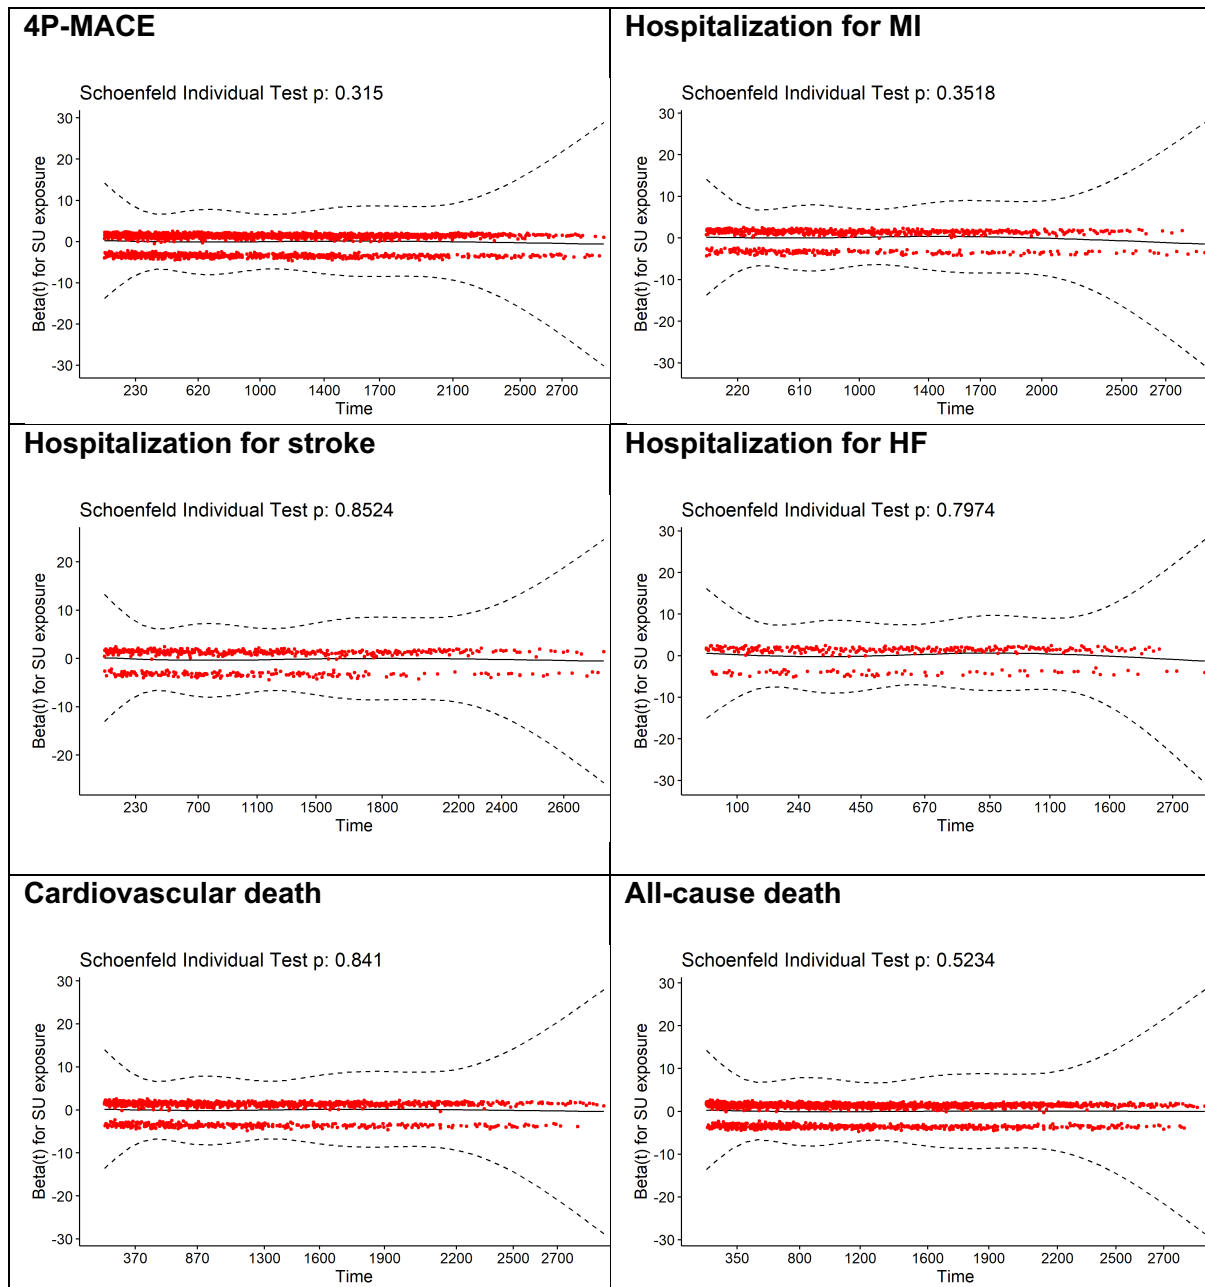

**sTable 10. Plot of Schoenfeld residuals for the comparison between SU vs DPP4i.**

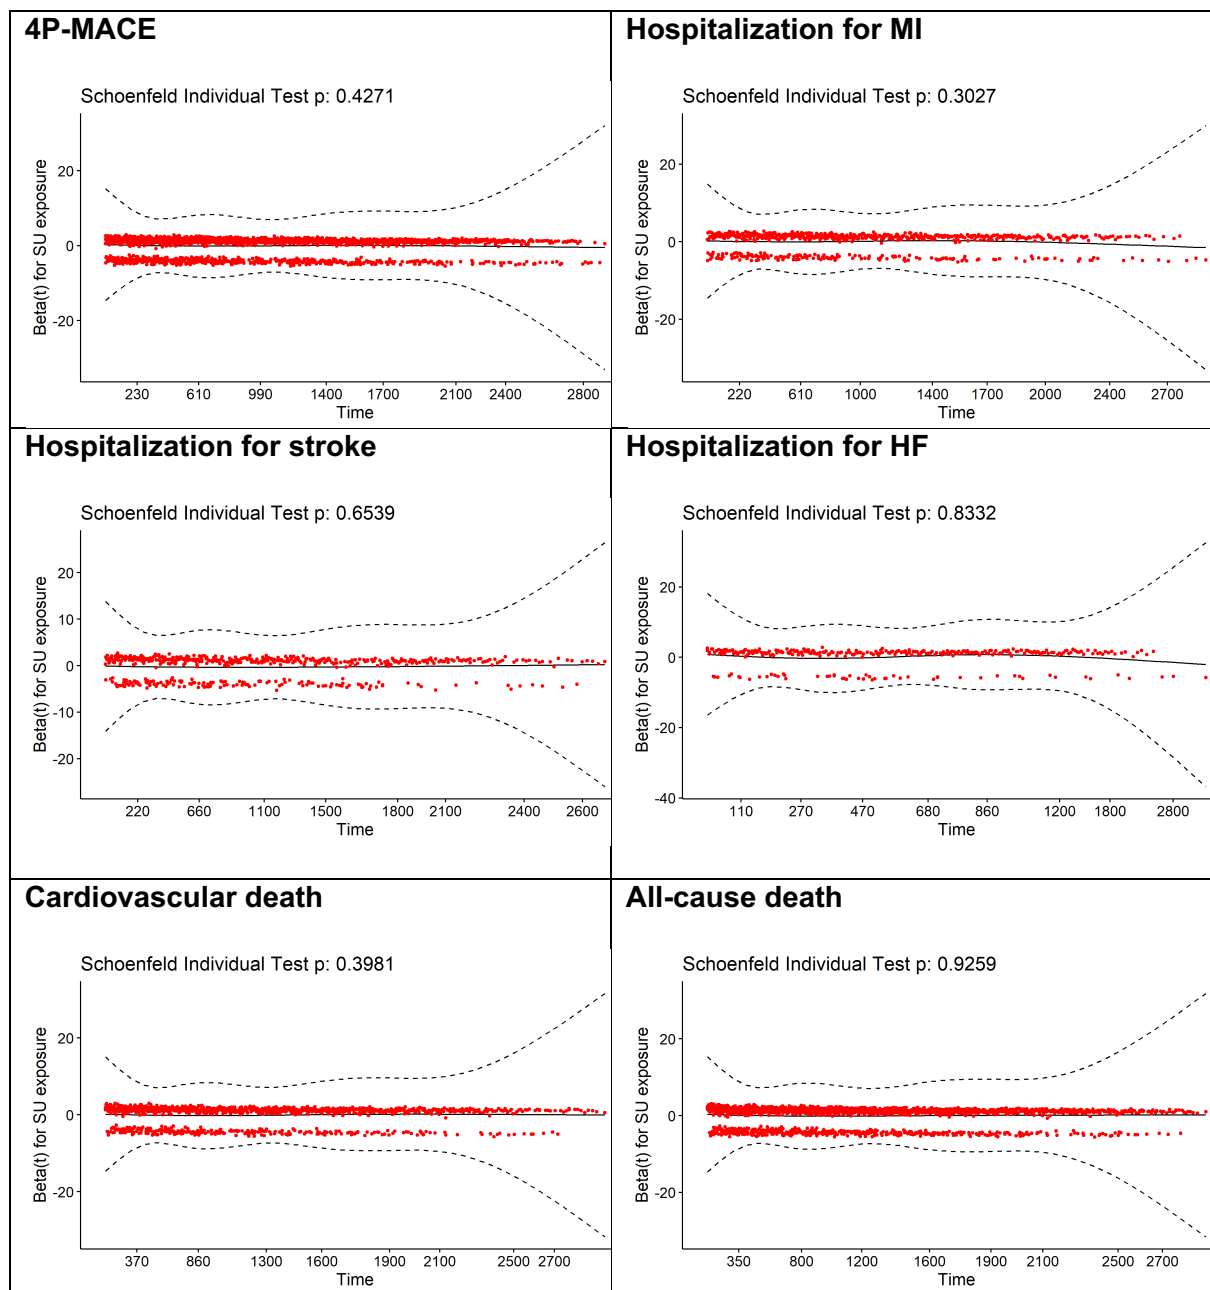

**sTable 11. Plot of Schoenfeld residuals for the comparison between SU vs TZD.**

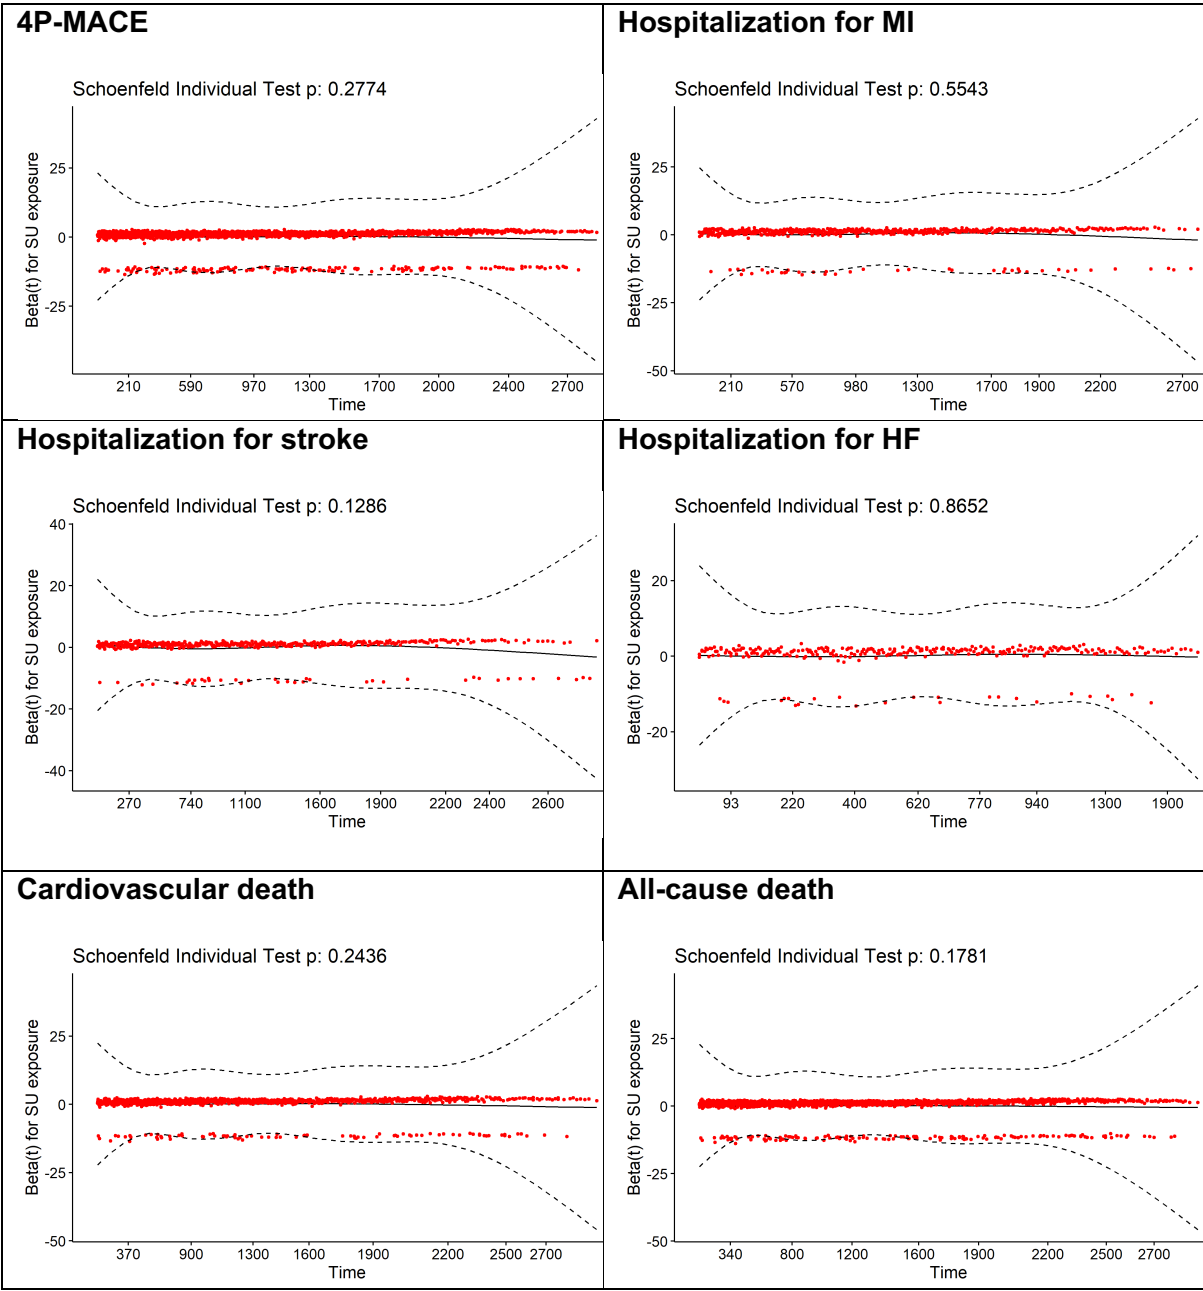

## References

1. Labrecque J, Swanson SA. Understanding the Assumptions Underlying Instrumental Variable Analyses: a Brief Review of Falsification Strategies and Related Tools. *Curr Epidemiol Rep.* 2018;5(3):214-20.
2. Uddin MJ, Groenwold RHH, de Boer A, Afonso ASM, Primatesta P, Becker C, et al. Evaluating different physician's prescribing preference based instrumental variables in two primary care databases: a study of inhaled long-acting beta2-agonist use and the risk of myocardial infarction. *Pharmacoepidemiology and Drug Safety.* 2016;25(S1):132-41.
3. Hernán MA RJ. *Causal Inference: What If.*: Boca Raton: Chapman & Hall/CRC; 2020.
