# Supplementary material
Source: publisher figshare collection journal article supplement (https://diabetesjournals.figshare.com/articles/dataset/_/22106990)
Supplement: Supplementary file 2 [file 2]

## **List of collaborators within the Scottish Diabetes Research Network epidemiology group**

Luke Blackbourn ([luke.blackbourn@ed.ac.uk](mailto:luke.blackbourn@ed.ac.uk));

Scott Cunningham ([s.g.y.cunningham@dundee.ac.uk](mailto:s.g.y.cunningham@dundee.ac.uk));

Fraser Gibb ([fraser.gibb@ed.ac.uk](mailto:fraser.gibb@ed.ac.uk));

Graham Leese ([graham.leese2@nhs.scot](mailto:graham.leese2@nhs.scot));

Robert Lindsay ([Robert.Lindsay@glasgow.ac.uk](mailto:Robert.Lindsay@glasgow.ac.uk));

David McAllister ([david.mcallister@glasgow.ac.uk](mailto:david.mcallister@glasgow.ac.uk));

Stuart McGurnaghan ([stuart.mcgurnaghan@ed.ac.uk](mailto:stuart.mcgurnaghan@ed.ac.uk));

Sam Philip ([sam.philip@nhs.scot](mailto:sam.philip@nhs.scot));
